# Supplementary material for: Food and Alcohol Disturbance in High School Adolescents: Prevalence, Characteristics and Association with Problem Drinking and Eating Disorders
Source: MDPI journal article supplement (doi:10.3390/ijerph21010083), 2024-01-11
Supplement: s1 [file s1]

## Supplementary Material

**Table S1.** Food and Alcohol Disturbance variables definitions in relation to the Compensatory Eating and Behaviors in Response to Alcohol Consumption Scale (CEBRACS).

| Variable          | Coding                                                   | Definition                                                                                                                                                                                                                                                                                                                                                                                                                                       |
|-------------------|----------------------------------------------------------|--------------------------------------------------------------------------------------------------------------------------------------------------------------------------------------------------------------------------------------------------------------------------------------------------------------------------------------------------------------------------------------------------------------------------------------------------|
| FAD               | 0=absent<br>1=present                                    | 1=presence of at least 1 item scored $\geq 2$<br>0=all items scored = 1                                                                                                                                                                                                                                                                                                                                                                          |
| FAD Severity      | continuous                                               | total score derived from the sum of the individual items scores (range 21 to 105)                                                                                                                                                                                                                                                                                                                                                                |
| FAD motive        | 0=absent FAD<br>1= EAE-FAD<br>2= WC-FAD<br>3= EAEWC-FAD) | 0=all items scored = 1<br>1= at least 1 item among items 1, 3, 6, 7, 9, 12, 14 scored $\geq 2$ and all remaining items scored 1<br>2= at least 1 item among items 2, 4, 5, 8, 10, 11, 13, 15, 16, 17, 18, 19, 20, 21 scored $\geq 2$ and all remaining items scored 1<br>3= at least 1 item among items 1, 3, 6, 7, 9, 12, 14 scored $\geq 2$ and at least 1 item among items 2, 4, 5, 8, 10, 11, 13, 15, 16, 17, 18, 19, 20, 21 scored $\geq 2$ |
| FAD-Before        | 0=absent<br>1=present                                    | 0= items 1 to 6 scored =1<br>1= at least 1 item among items 1 to 6 scored $\geq 2$                                                                                                                                                                                                                                                                                                                                                               |
| FAD-During        | 0=absent<br>1=present                                    | 0= items 7 to 14 scored =1<br>1= at least 1 item among items 7 to 14 scored $\geq 2$                                                                                                                                                                                                                                                                                                                                                             |
| FAD-After         | 0=absent<br>1=present                                    | 0= items 15 to 21 scored =1<br>1= at least 1 item among items 15 to 21 scored $\geq 2$                                                                                                                                                                                                                                                                                                                                                           |
| FAD-Restrictive   | 0=absent<br>1=present                                    | 0= items 4, 10, 11, 16, 20, 21 scored =1<br>1= at least 1 item among items 4, 10, 11, 16, 20, 21 scored $\geq 2$                                                                                                                                                                                                                                                                                                                                 |
| FAD-Hyperactivity | 0=absent<br>1=present                                    | 0= items 2 and 18 scored =1<br>1= at least 1 item among items 2 and 18 scored $\geq 2$                                                                                                                                                                                                                                                                                                                                                           |
| FAD-Purging       | 0=absent<br>1=present                                    | 0= items 5, 8, 13, 15, 17, 19 scored =1<br>1= at least 1 item among items 5, 8, 13, 15, 17, 19 scored $\geq 2$                                                                                                                                                                                                                                                                                                                                   |

EAE-FAD=FAD behaviors to enhance alcohol effect; WC-FAD=FAD behaviors to control weight; EAEWC-FAD=FAD behaviors to both enhance alcohol effect and control weight; FAD-Before=FAD before alcohol use; FAD-During=FAD during alcohol use; FAD-After=FAD after alcohol use; FADrestrictive=restricting calories; FAD-hyperactivity=physical activity; FAD-purging=purging behaviors.

**Table S2.** Results of linear regression analysis with Food and Alcohol Disturbance (FAD, 0=not reported; 1=reported), gender (0=females,1=males), age (continuous) and Lifetime Substance Use (SU, 0=not reported; 1=reported) as predictors and Problem Drinking (PD) Severity as dependent variable. Only participants who reported to engage in FAD behaviors with weight control purposes (WC-FAD and EAEWCFAD) were included. Results are reported for all categories. Significant predictors ( $\alpha=0.05$ ) are bolded. PD=Problem Drinking; EDR=Eating Disorder Risk.

| GROUP              | DEPENDENT VARIABLE: PD SEVERITY |                                 |         |        |                                |
|--------------------|---------------------------------|---------------------------------|---------|--------|--------------------------------|
|                    | Variables                       | B (95% CI); SE                  | $\beta$ | p      | Adjusted R <sup>2</sup> ; F; p |
| CONTROL<br>(n=638) | (Constant)                      | -3.542 (-4.564 - -2.521); 0.520 |         | <0.001 | 0.305; 70.743; <0.001          |
|                    | <b>Gender</b>                   | 0.253 (0.042 - 0.464); 0.107    | 0.078   | 0.019  |                                |
|                    | <b>Age</b>                      | 0.280 (0.217 - 0.343); 0.032    | 0.293   | <0.001 |                                |
|                    | <b>FAD</b>                      | 1.669 (1.345 - 1.993); 0.165    | 0.338   | <0.001 |                                |
|                    | <b>Lifetime SU</b>              | 1.044 (0.716 - 1.372); 0.167    | 0.211   | <0.001 |                                |
| PD<br>(n=152)      | (Constant)                      | 5.705 (-4.996 - 14.093); 5.066  |         | 0.262  | 0.066; 3.646; 0.007            |
|                    | Gender                          | 1.563 (-0.448 - 2.994); 0.908   | 0.138   | 0.087  |                                |
|                    | Age                             | 0.125 (-0.354 - 0.763); 0.297   | 0.034   | 0.674  |                                |
|                    | <b>FAD</b>                      | 2.822 (0.939 - 3.998); 0.828    | 0.271   | <0.001 |                                |
|                    | Lifetime SU                     | -0.066 (-1.636 - 1.507); 0.837  | -0.006  | 0.938  |                                |
| EDR<br>(n=56)      | (Constant)                      | -4.513 (-7.710 - -1.316); 1.592 |         | 0.007  | 0.456; 12.530; <0.001          |
|                    | Gender                          | -1.327 (-1.746 - -0.903); 0.707 | -0.046  | 0.646  |                                |
|                    | <b>Age</b>                      | 0.336 (0.129-0.542); 0.103      | 0.345   | 0.002  |                                |
|                    | <b>FAD</b>                      | 1.748 (0.944 - 2.552); 0.401    | 0.486   | <0.001 |                                |
|                    | Lifetime SU                     | 0.312 (-0.776 - 1.400); 0.542   | 0.061   | 0.567  |                                |

**Table S3.** Results of linear regression analysis with Food and Alcohol Disturbance (FAD, 0=not reported; 1=reported), gender (0=females,1=males), age (continuous) and Lifetime Substance Use (SU, 0=not reported; 1=reported) as predictors and Eating Disorders (ED) Symptoms Severity as dependent variable. Only participants who reported to engage in FAD behaviors with weight control purposes (WC-FAD and EAEWC-FAD) were included. Results are reported for all categories. Significant predictors ( $\alpha=0.05$ ) are bolded. PD=Problem Drinking; EDR=Eating Disorder Risk.

| GROUP              | DEPENDENT VARIABLE: ED SYMPTOMS SEVERITY |                                    |         |        |                                |
|--------------------|------------------------------------------|------------------------------------|---------|--------|--------------------------------|
|                    | Variables                                | B (95% CI); SE                     | $\beta$ | p      | Adjusted R <sup>2</sup> ; F; p |
| CONTROL<br>(n=638) | (Constant)                               | 36.948 (26.631 - 47.265); 5.254    |         | <0.001 | 0.193; 39.014; <0.001          |
|                    | <b>Gender</b>                            | -12.871 (-15.002 - -10.740); 1.085 | -0.425  | <0.001 |                                |
|                    | <b>Age</b>                               | -0.795 (-1.431 - -0.158); 0.324    | -0.089  | 0.015  |                                |
|                    | <b>FAD</b>                               | 5.815 (2.541 - 9.089); 1.667       | 0.126   | <0.001 |                                |
|                    | <b>Lifetime SU</b>                       | 3.522 (0.207 - 6.837); 1.688       | 0.076   | 0.037  |                                |
| PD<br>(n=152)      | (Constant)                               | 39.595 (15.179 - 64.010); 12.355   |         | 0.002  | 0.315; 18.348; <0.001          |
|                    | <b>Gender</b>                            | -16.260 (-20.647 - -11.894); 2.214 | -0.503  | <0.001 |                                |
|                    | Age                                      | -0.420 (-1.849 - 1.009); 0.723     | -0.040  | 0.562  |                                |
|                    | <b>FAD</b>                               | 5.454 (1.462 - 9.447); 2.020       | 0.184   | 0.008  |                                |
|                    | Lifetime SU                              | -3.326 (-7.360 - 0.707); 2.041     | -0.112  | 0.105  |                                |
| EDR<br>(n=56)      | (Constant)                               | 72.859 (53.678 - 92.040); 9.554    |         | <0.001 | 0.011; 1.148; 0.345            |
|                    | Gender                                   | 0.153 (-8.366 - 8.672); 4.243      | 0.005   | 0.971  |                                |
|                    | Age                                      | -0.117 (-1.357 - 1.123); 0.618     | -0.027  | 0.850  |                                |
|                    | <b>FAD</b>                               | -4.537 (-9.362 - 0.288); 2.403     | -0.284  | 0.065  |                                |
|                    | Lifetime SU                              | 0.538 (-5.991 - 7.067); 3.252      | 0.023   | 0.869  |                                |
